# Supplementary material for: De Novo Assembly and Annotation of the Transcriptome of the Agricultural Weed Ipomoea purpurea Uncovers Gene Expression Changes Associated with Herbicide Resistance
Source: PubMed Central journal article supplement (PMC4199709; doi:10.1534/g3.114.013508), 2014-08-25
Supplement: supp_g3.114.013508_013508SI.pdf [file supp_g3.114.013508_013508SI.pdf]

***De novo* assembly and annotation of the transcriptome of the agricultural weed *Ipomoea purpurea* uncovers gene expression changes associated with herbicide resistance**

Trent Leslie<sup>1</sup>  
Regina S Baucom<sup>2</sup>

<sup>1</sup>Department of Biological Sciences  
University of Cincinnati  
Cincinnati, OH 45221  
trentleslie@gmail.com

<sup>2</sup>2059 Kraus Natural Science Building  
Department of Ecology and Evolutionary Biology  
University of Michigan  
Ann Arbor, MI 48103  
[rsbaucom@umich.edu](mailto:rsbaucom@umich.edu)  
(734) 647-8490 (office phone)  
(734) 763-0544 (fax)  
<sup>2</sup>author for correspondence

Data Archival Location

-RNAseq data is available in the SRA database of NCBI, and can be accessed via this link:  
<http://www.ncbi.nlm.nih.gov/bioproject/?term=PRJNA216984>

-The *Ipomoea* transcriptome is available through the 1kp plant transcriptome project and can be accessed through  
<http://www.onekp.com/>

-Annotation of the *I. purpurea* reference transcriptome is made available as supplemental material and can be found in TableS1.txt

**DOI: 10.1534/g3.114.013508**

## File S1

### Supplemental methods, results, tables and figures

#### *Methods—Mapping specificity and bias*

We examined both the position on the scaffold to which the reads mapped and the scaffold length to determine if they might influence our ability to assess differences in gene expression between resistant and susceptible lines. The median mapping position of the reads across all scaffolds was base pair 616; nearly one percent of all reads mapped to the first base pair of the scaffold (0.8%, Figure S2b). We found a weak positive correlation between the mean mapping position of all the reads on a scaffold and the number of reads that mapped to the scaffolds ( $R^2 = 0.28$ ,  $p < 2.2e-16$ , Figure S2c). This suggests that scaffolds with average mapping positions farther from the 3' end of the scaffold exhibit higher expression than those with average mapping positions closer to the 3' end. Likewise, a moderate positive correlation exists between the edgeR counts per million across all samples and the scaffold length ( $R^2 = 0.30$ ,  $p < 2.2e-16$ , Figure S2d), suggesting that longer scaffolds may exhibit higher expression than shorter scaffolds. These results should not impact our broad comparison of gene expression differences, as the same genes and thus scaffolds are being compared between R and S individuals, and, the correlations between variables are relatively modest. However, if a short scaffold is the causal agent(s) underlying resistance, and the average expression of short scaffolds is lower than longer scaffolds, then scaffold length bias in our data could increase our probability of type II error. To test for such an effect, we performed an analysis wherein scaffolds were binned according to length (200-1,000 bp, 1,001-2,000 bp, 2,001-3,000 bp, and >3,000 bp) and gene expression patterns were assessed between R and S individuals as for the entire dataset.

#### *Results—Mapping specificity and bias*

When scaffolds were binned according to length, edgeR identified 17 differentially expressed genes, 15 of which were identified in the analysis of the full dataset (Figures S3; Table S4). Four genes—all within the 200-1000 bp bin – were lost compared to the overall dataset, and two genes – both from the 1001-2000 bp bin – were gained. Thus, we do not find that the relationship between read count and scaffold length significantly influences our ability to uncover differential expression of the shorter scaffolds. The two genes that were gained by binning were annotated by Blast2GO as an ATP-binding protein (*XP\_002518555*) and indoleacetic acid-induced-like protein (*XP\_002264963*).

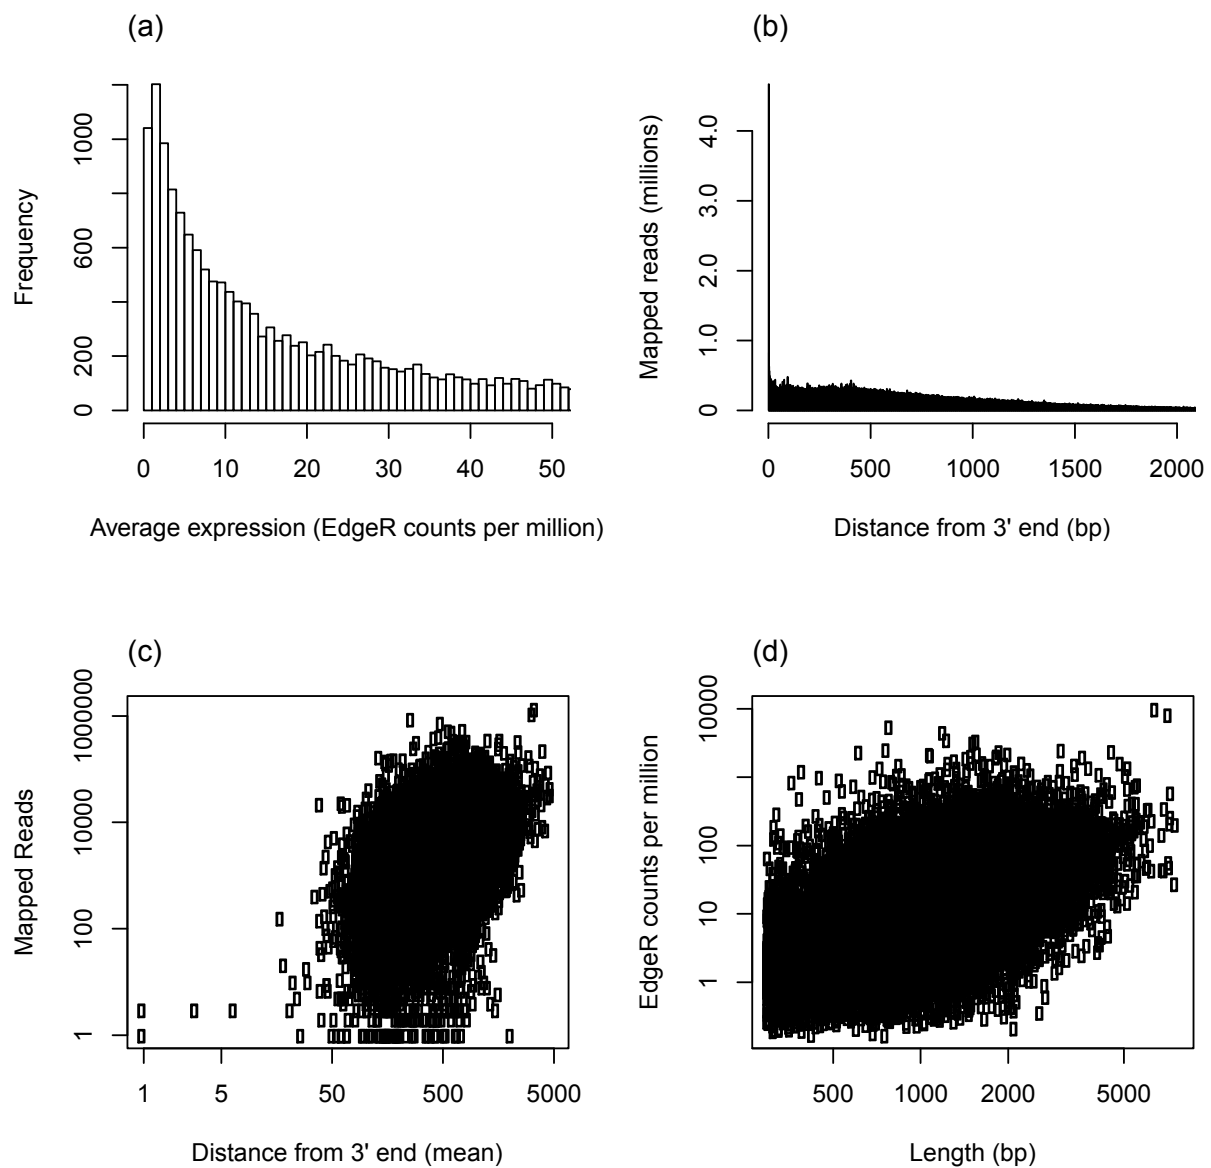

**Figure S1** Mapping specificity in RNA-Seq expression profiles. Histograms of (a) average expression (edgeR counts per million) and (b) read mapping positions across samples. (c) Number of mapped reads vs. mean mapping position ( $R^2 = 0.28$ ,  $p < 2.2 \times 10^{-16}$ ). This illustrates the relationship between the number of reads that map to a particular scaffold and the mean mapping position of those reads. (d) The relationship between edgeR counts per million and scaffold length ( $R = 0.30$ ,  $p < 2.2 \times 10^{-16}$ ).

**Table S1 Annotation of the *I. purpurea* reference transcriptome.**

Available for download as a .zip file at <http://www.g3journal.org/lookup/suppl/doi:10.1534/g3.114.013508/-/DC1>

**Table S2 RNA-Seq analysis of common morning glory (*I. purpurea*) using the Illumina hiseq2000L sequencing yields and quality filtering.**

| Treatments                 | Sample  | Reads (M) | HQ (M) | HQ (%) |
|----------------------------|---------|-----------|--------|--------|
| Glyphosate Susceptible     | 068-1-1 | 65.8      | 62.9   | 95.6   |
|                            | 077-1-2 | 67.4      | 64.4   | 95.5   |
|                            | 079-1-3 | 41.2      | 39.0   | 94.7   |
| Glyphosate Resistant       | 336-1-2 | 152.0     | 146.9  | 96.6   |
|                            | 351-1-2 | 57.5      | 54.2   | 94.3   |
|                            | 358-1-3 | 78.3      | 75.0   | 95.8   |
| Total raw reads (millions) |         | 462.2     | 442.4  |        |
| Average per sample         |         | 77.0      | 73.7   | 95.4   |

**Table S3 Efficiency of mapping Illumina hiseq2000 RNA-Seq reads against the *I. purpurea* reference transcriptome, a de novo cDNA assembly.** Note Bowtie2 reports on paired reads, effectively halving the absolute raw and HQ read counts seen in Table S1.

| Treatments                    | Sample  | Mapped Reads |                  | Unique Alignments |      |
|-------------------------------|---------|--------------|------------------|-------------------|------|
|                               |         | (M)          | Mapped Reads (%) | (M)               | (%)  |
| Glyphosate Susceptible        | 068-1-1 | 14.9         | 47.4             | 12.8              | 40.6 |
|                               | 077-1-2 | 15.1         | 46.8             | 12.8              | 39.6 |
|                               | 079-1-3 | 9.1          | 46.5             | 7.6               | 39.1 |
| Glyphosate Resistant          | 336-1-2 | 33.5         | 45.6             | 28.7              | 39.1 |
|                               | 351-1-2 | 14.6         | 65.7             | 13.6              | 54.7 |
|                               | 358-1-3 | 22.2         | 59.1             | 19.0              | 50.6 |
| Total mapped reads (millions) |         | 109.4        |                  | 94.5              |      |
| Percent of HQ reads mapped    |         | 49.4         |                  | 42.8              |      |
| Percent of raw reads mapped   |         | 47.4         |                  | 40.8              |      |

**Table S4 Primers developed for the qPCR verification of DEGs.**

| Sequence Name       | Sequence                   | Tm (50mM NaCl) C |
|---------------------|----------------------------|------------------|
| abc-b_2016948_178F  | CTT TGC TGG CTT TCT TGG AC | 54.52741302      |
| abc-b_2016948_178R  | GGT GAT CGA ATG GCG TTA CT | 54.99775102      |
| atpbin-2010370_162F | CTC CGC TCT TTC TTC CAA TG | 53.5183376       |
| atpbin-2010370_162R | TGC AGT ATA TCG GTG GTG GA | 55.53902069      |
| brass-2061274_150F  | CTG GTA TAA CGA GCC GGT GT | 56.76005614      |
| brass-2061274_150R  | GCA TAG ATT TCG ACG GCA TT | 53.33061546      |
| ceram-2056577_177F  | GAG CCA GGC TTG AGA GTG TT | 57.31439485      |
| ceram-2056577_177R  | GCT GTT TGC AAT GTG AGC AT | 54.56376496      |
| cysrec-2011172_162F | GGT TCC CTA GCT CCC TCA TC | 56.77992894      |
| cysrec-2011172_162R | ACT AGG TCA CCG CCT CTT CA | 57.77335135      |
| germd-2001731_176F  | TTG AGC CAA ATG GAA CAA CA | 52.8778193       |
| germd-2001731_176R  | CCA AAA GTA GCC TTC CAC CA | 55.03216815      |
| glut-s_2002932_175F | TTT TGT GCA CTT GGG TTG AA | 53.31376738      |
| glut-s_2002932_175R | GCA CCA GTT TCA ATT GGC TT | 54.2963209       |
| helica-2013762_163F | TTG CAA CTG GCT TTC AAC AG | 54.15438015      |
| helica-2013762_163R | ATT TTC TGC AAA CCT GGT GG | 53.78453676      |
| P450_1-2005659_173F | TGT ATC AAC CAC GGT CTC CA | 55.65938391      |
| P450_1-2005659_173R | CGC GCT TTC CTA TCT ACC AG | 55.29411425      |
| P450_2-2003522_172F | GAG CAA AAA CCT TGC AGA CC | 54.76344105      |
| P450_2-2003522_172R | AAT TGC TGG ACA CCA ACC TC | 55.56952121      |
| P450a_2003581_168F  | AGT GCT GGT GGT TAG CGA CT | 58.78593189      |
| P450a_2003581_168R  | ATA AGT TTG CGA ATC CCA CG | 53.24697226      |
| pecmet_2017152_161F | TAG AAT TGC CGC TGA CTG TG | 55.20539275      |
| pecmet_2017152_161R | GAT GGG TTC ATA GCC CAA GA | 54.40150801      |
| proto_2011804_157F  | CGG AGT TCT GGT ATT GGG GT | 56.64581809      |
| proto_2011804_157R  | CAT AAA GGT GGC GAC GAT GG | 56.10508724      |

|                      |                            |             |
|----------------------|----------------------------|-------------|
| serthre-2055046_161F | GGA GAA GGG AAG TCT CGA CC | 56.78871641 |
| serthre-2055046_161R | TGA TCG GAG TGT CCA ATG AG | 54.20362614 |
| vichyd_2063945_178F  | TAT TTG GTG ATC GCG TGA AA | 52.35251201 |
| vichyd_2063945_178R  | TGA GCA AGA AGC AAA TGG TG | 53.72764614 |
| wb-abc_2017606_160F  | AAG CTT CTG TTC CTG GAC GA | 56.15266566 |
| wb-abc_2017606_160R  | GGC ACA GGC TAG TGA AGA GG | 57.64456754 |

---



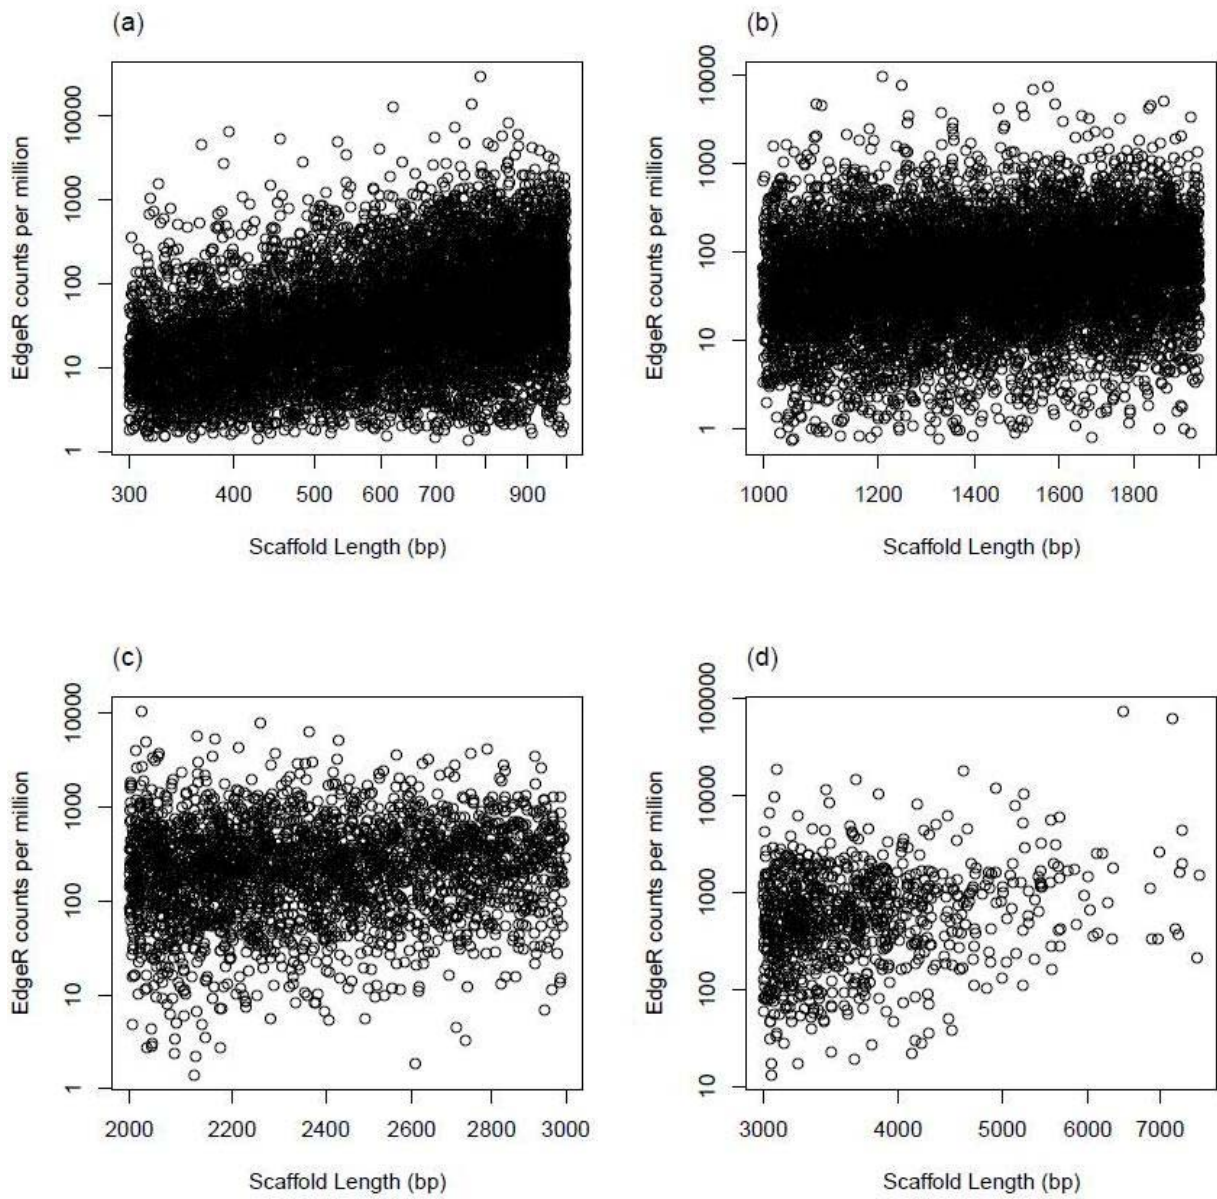

**Figure S2** Binned edgeR counts per million plotted against binned scaffold lengths. (a) 200-1000 bp scaffolds ( $p < 2.2e-16$ ,  $R^2=0.159$ ) (b) 1001-2000 bp scaffolds ( $p < 2.2e-16$ ,  $R^2=0.02655$ ) (c) 2001-3000 bp scaffolds ( $p = 5.67e-7$ ,  $R^2=0.00925$ ) (d) >3000 bp scaffolds ( $p=9.57e-12$ ,  $R^2=0.0504$ )

**Table S5** Differentially expressed genes as identified by edgeR after binning scaffolds based on length (bins were defined as 200-1000 bp, 1001-2000 bp, 2001-3000 bp, and >3000 bp). Note resistant/susceptible log<sub>2</sub> fold changes.

| rank | bin (bp)    | Scaffold ID | topblast                                                   | logFC        | logCPM      | PValue   | padj        |
|------|-------------|-------------|------------------------------------------------------------|--------------|-------------|----------|-------------|
| 1    | 1,001-2,000 | 2009240     | protein                                                    | -4.956514395 | 4.417191331 | 1.60F-13 | 1.33F-09    |
| 2    | 1,001-2,000 | 2063945     | vicianin hydrolase-like                                    | -2.951166513 | 5.431831016 | 8.98F-10 | 3.72F-06    |
| 3    | 1,001-2,000 | 2001731     | [-]-germacrene d synthase                                  | 4.77309533   | 3.683966828 | 7.52F-09 | 2.07F-05    |
| 4    | 200-1,000   | 2056577     | ceramidase family protein                                  | -7.490398504 | 3.019096973 | 5.90F-09 | 4.79F-05    |
| 5    | 1,001-2,000 | 2009241     | protein                                                    | -4.183410284 | 3.563076107 | 4.15F-08 | 8.60F-05    |
| 6    | 1,001-2,000 | 2005233     | [-]-germacrene d synthase                                  | 5.375616041  | 2.268376148 | 9.28F-08 | 0.000153718 |
| 7    | 1,001-2,000 | 2010370     | atp binding                                                | -4.830721823 | 4.01726904  | 1.23F-06 | 0.001701055 |
| 8    | 1,001-2,000 | 2002437     | protein                                                    | 2.476840484  | 5.144280666 | 3.69F-06 | 0.004362936 |
| 9    | 1,001-2,000 | 2061274     | brassinosteroid insensitive 1-associated receptor kinase 1 | -4.079306873 | 4.148482421 | 4.98F-06 | 0.005147925 |
| 10   | 200-1,000   | 2003581     | cytochrome p450 82a3-like                                  | 3.295661347  | 3.632279277 | 2.64F-06 | 0.010717398 |
| 11   | 1,001-2,000 | 2004377     | protein                                                    | -3.861554692 | 3.112662587 | 3.24F-05 | 0.029797255 |
| 12   | 1,001-2,000 | 2013762     | u5 small nuclear ribonucleoprotein helicase                | 5.089691419  | 1.196586827 | 3.61F-05 | 0.02985129  |
| 13   | 1,001-2,000 | 2009597     | atp binding                                                | -1.930162869 | 8.43404822  | 4.09F-05 | 0.030796464 |
| 14   | 1,001-2,000 | 2017152     | pectin methylesterase                                      | -3.254112192 | 4.114218356 | 4.61F-05 | 0.031807096 |
| 15   | 200-1,000   | 2054556     | protein                                                    | 3.437708896  | 2.968028123 | 1.75F-05 | 0.036093279 |
| 16   | 200-1,000   | 2059855     | protein kinase                                             | 4.123441785  | 4.96632482  | 1.78F-05 | 0.036093279 |
| 17   | 1,001-2,000 | 2010065     | indoleacetic acid-induced-like protein                     | -2.027993775 | 4.890619041 | 5.67F-05 | 0.036114335 |

**Table S6 Annotation of the cytochrome P450 genes in the *Ipomoea* transcriptome.**

Available for download as an Excel file at <http://www.g3journal.org/lookup/suppl/doi:10.1534/g3.114.013508/-/DC1>

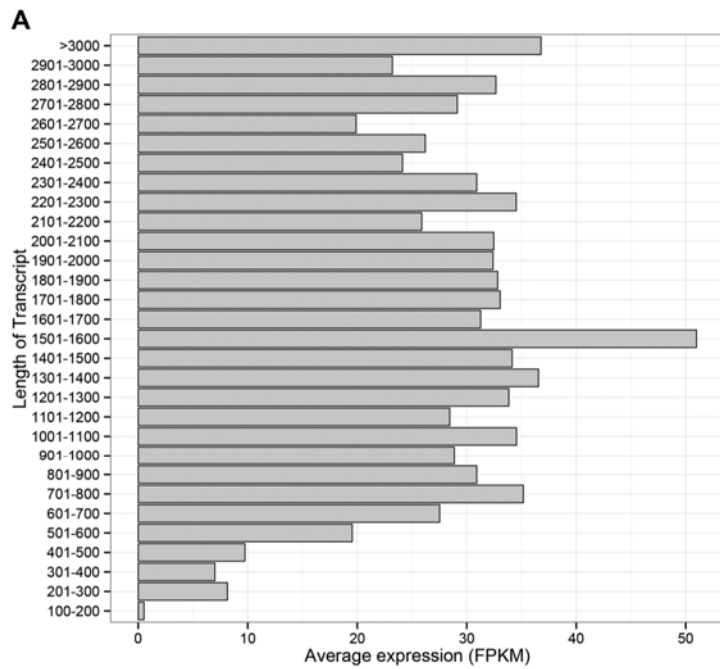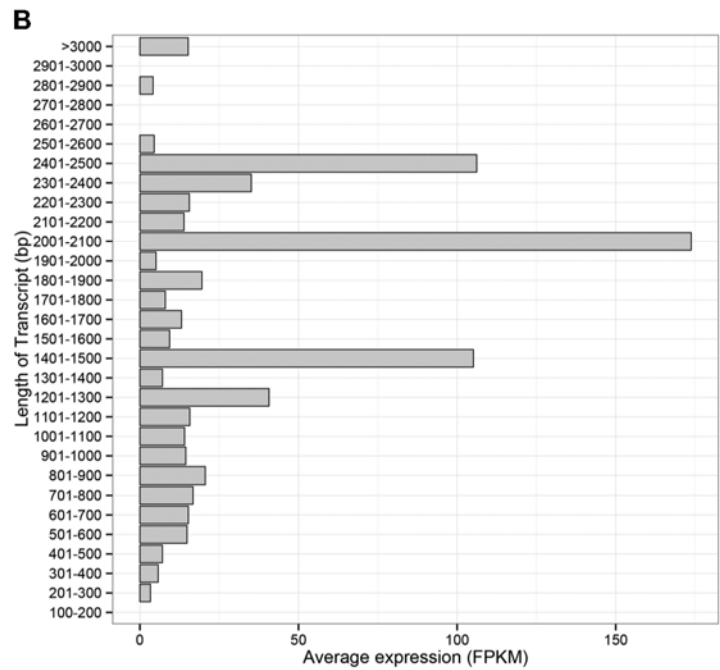

**Figure S3** Average expression (FPKM) values according to transcript length shown by (A) transcripts that were annotated by blastx to the NCBI nr database, and (B) transcripts that could not be annotated by blast.

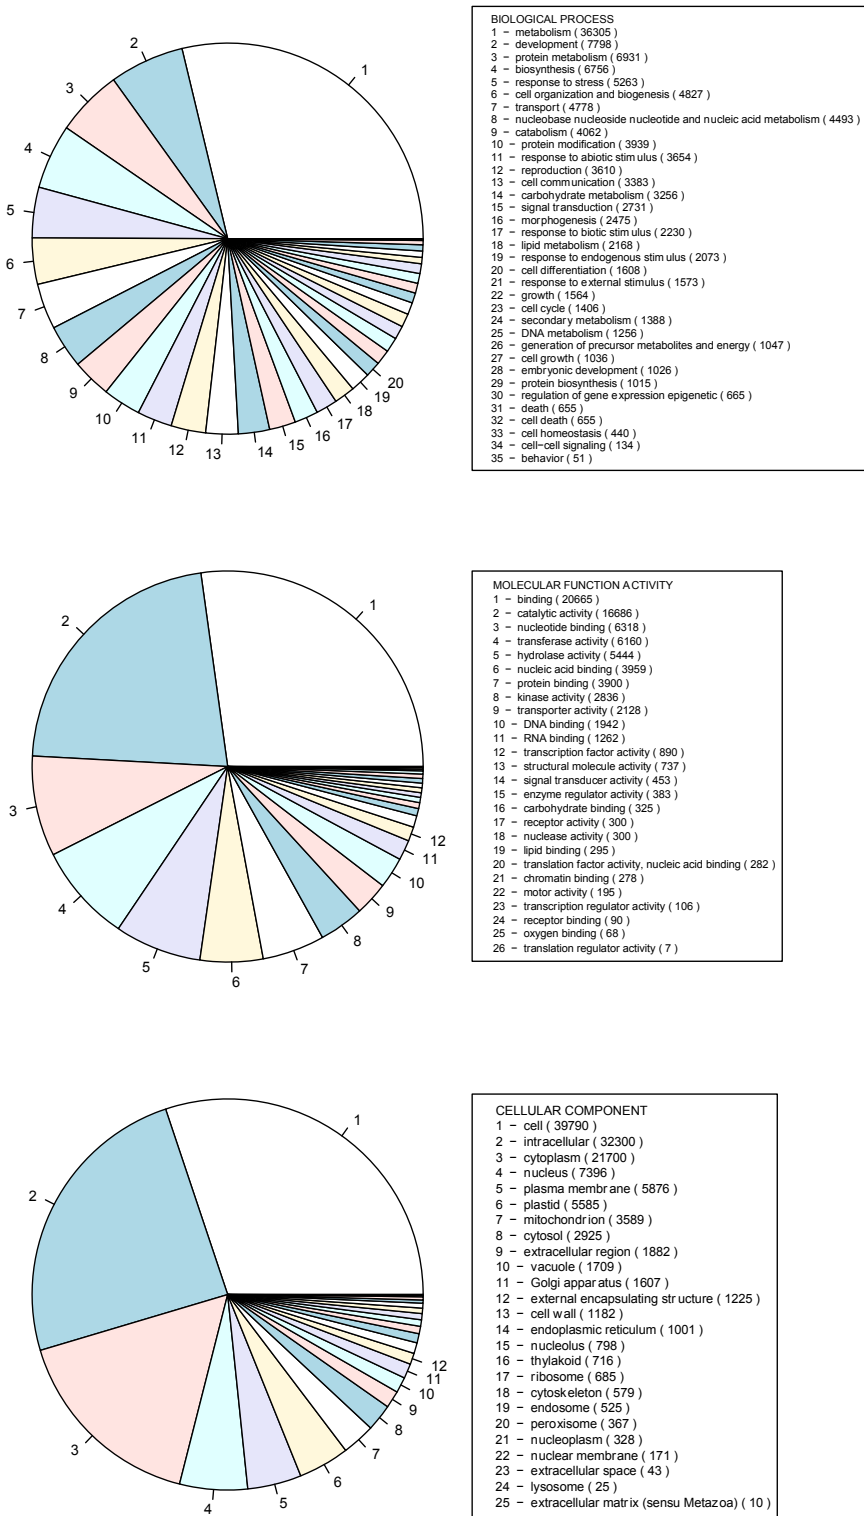

**Figure S4** The distribution of transcripts within the *I. purpurea* transcriptome assigned to GOSlim categories within the Biological Process, Molecular Function and Cellular Component GO categories.

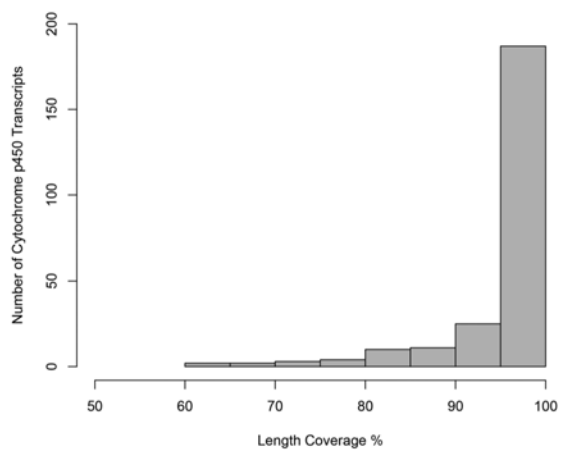

**Figure S5** Examination of the protein length of cytochrome p450 transcriptoms from the *I. purpurea* transcriptome as in Figure 3.
