# Supplementary material for: De Novo Assembly and Annotation of the Transcriptome of the Agricultural Weed Ipomoea purpurea Uncovers Gene Expression Changes Associated with Herbicide Resistance
Source: PubMed Central journal article supplement (PMC4199709; doi:10.1534/g3.114.013508), 2014-08-25
Supplement: supp_g3.114.013508_FigureS1.pdf [file supp_g3.114.013508_FigureS1.pdf]

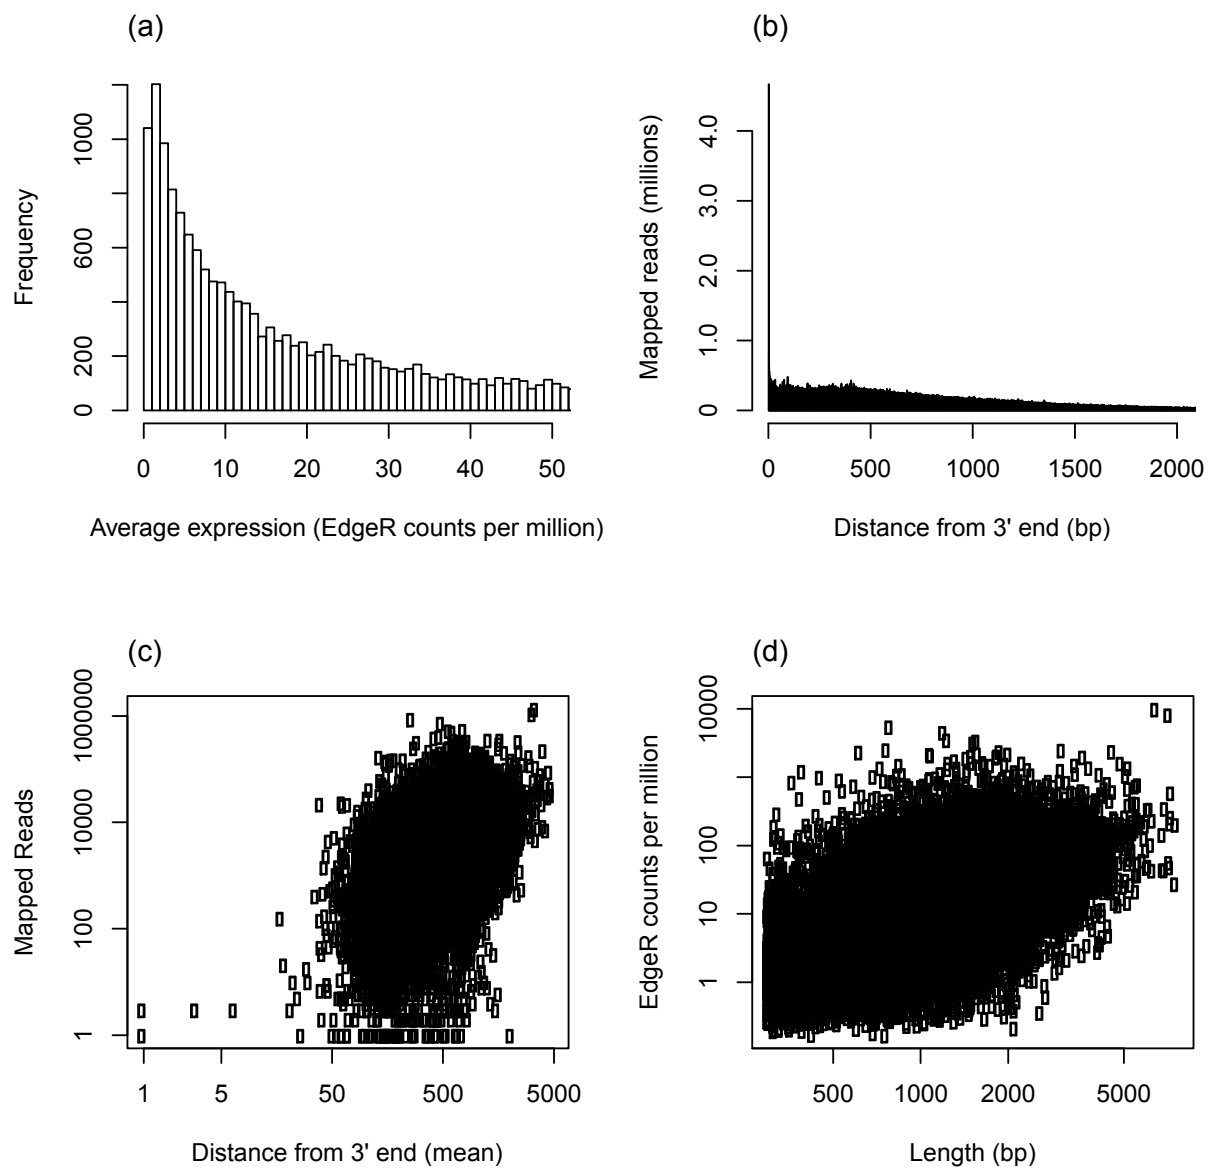

**Figure S1** Mapping specificity in RNA-Seq expression profiles. Histograms of (a) average expression (edgeR counts per million) and (b) read mapping positions across samples. (c) Number of mapped reads vs. mean mapping position ( $R^2 = 0.28$ ,  $p < 2.2 \times 10^{-16}$ ). This illustrates the relationship between the number of reads that map to a particular scaffold and the mean mapping position of those reads. (d) The relationship between edgeR counts per million and scaffold length ( $R = 0.30$ ,  $p < 2.2 \times 10^{-16}$ ).
