# Supplementary material for: De Novo Assembly and Annotation of the Transcriptome of the Agricultural Weed Ipomoea purpurea Uncovers Gene Expression Changes Associated with Herbicide Resistance
Source: PubMed Central journal article supplement (PMC4199709; doi:10.1534/g3.114.013508), 2014-08-25
Supplement: supp_g3.114.013508_FigureS2.pdf [file supp_g3.114.013508_FigureS2.pdf]

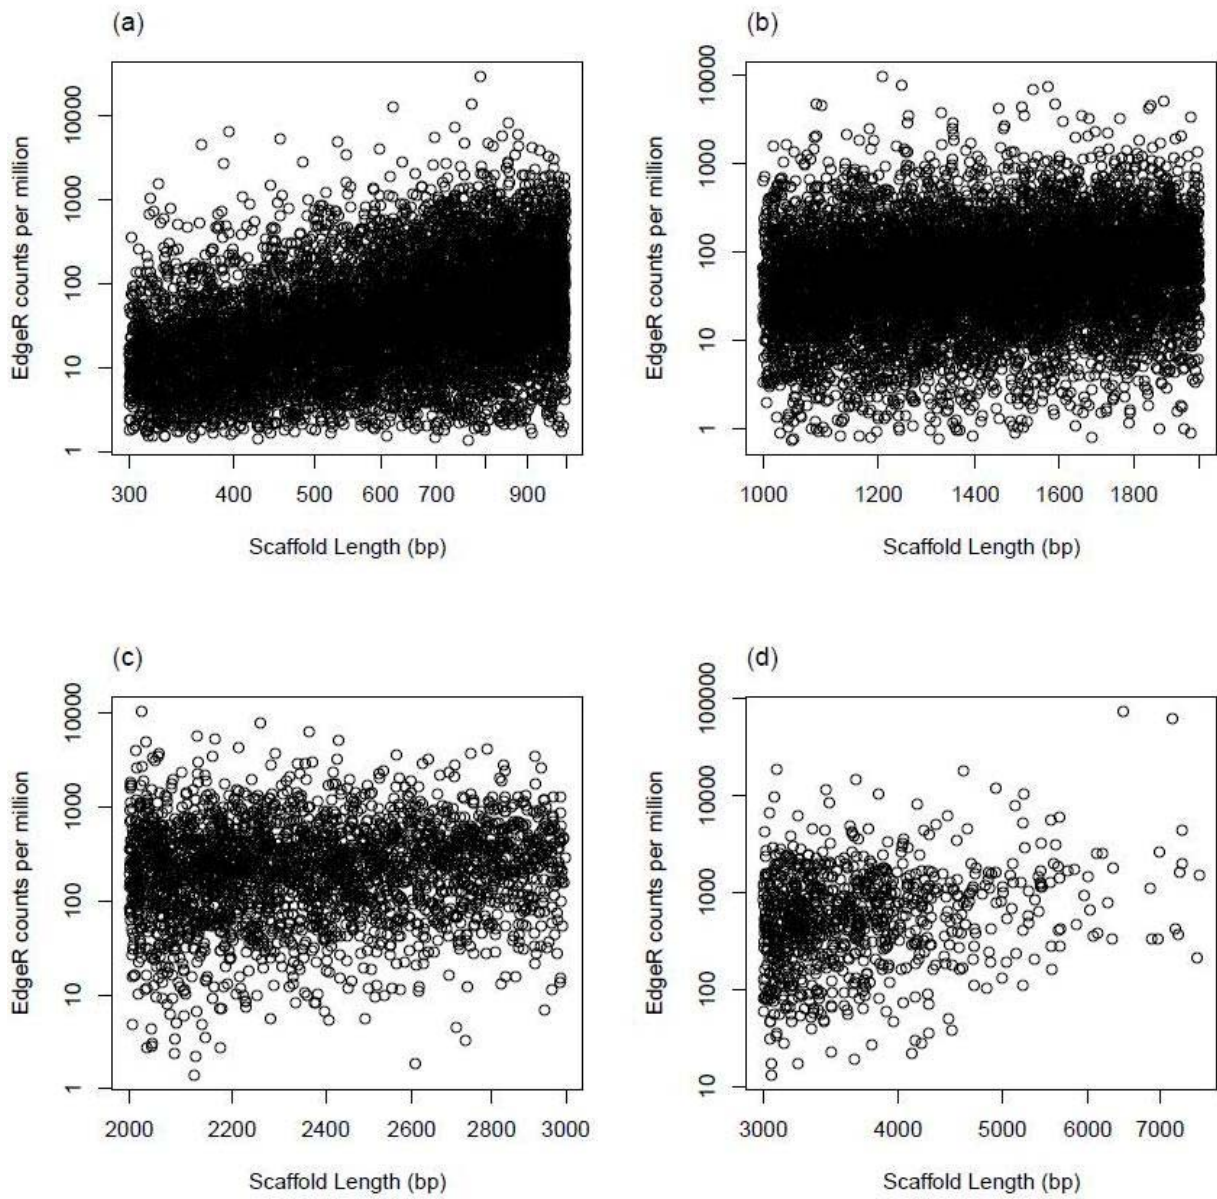

**Figure S2** Binned edgeR counts per million plotted against binned scaffold lengths. (a) 200-1000 bp scaffolds ( $p < 2.2e-16$ ,  $R^2=0.159$ ) (b) 1001-2000 bp scaffolds ( $p < 2.2e-16$ ,  $R^2=0.02655$ ) (c) 2001-3000 bp scaffolds ( $p = 5.67e-7$ ,  $R^2=0.00925$ ) (d) >3000 bp scaffolds ( $p=9.57e-12$ ,  $R^2=0.0504$ )
