# Supplementary material for: De Novo Assembly and Annotation of the Transcriptome of the Agricultural Weed Ipomoea purpurea Uncovers Gene Expression Changes Associated with Herbicide Resistance
Source: PubMed Central journal article supplement (PMC4199709; doi:10.1534/g3.114.013508), 2014-08-25
Supplement: supp_g3.114.013508_FigureS4.pdf [file supp_g3.114.013508_FigureS4.pdf]

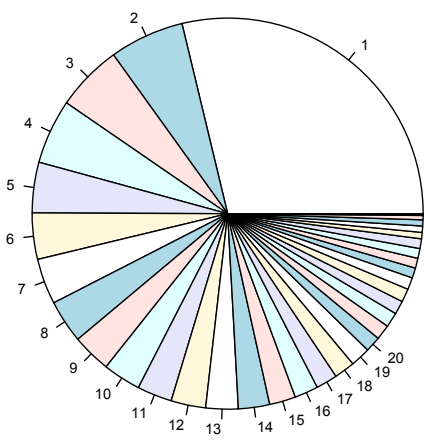

| BIOLOGICAL PROCESS |                                                                         |
|--------------------|-------------------------------------------------------------------------|
| 1                  | - metabolism ( 36305 )                                                  |
| 2                  | - development ( 7798 )                                                  |
| 3                  | - protein metabolism ( 6931 )                                           |
| 4                  | - biosynthesis ( 6766 )                                                 |
| 5                  | - response to stress ( 5263 )                                           |
| 6                  | - cell organization and biogenesis ( 4827 )                             |
| 7                  | - transport ( 4778 )                                                    |
| 8                  | - nucleobase nucleoside nucleotide and nucleic acid metabolism ( 4493 ) |
| 9                  | - catabolism ( 4062 )                                                   |
| 10                 | - protein modification ( 3939 )                                         |
| 11                 | - response to abiotic stimulus ( 3654 )                                 |
| 12                 | - reproduction ( 3610 )                                                 |
| 13                 | - cell communication ( 3383 )                                           |
| 14                 | - carbohydrate metabolism ( 3256 )                                      |
| 15                 | - signal transduction ( 2731 )                                          |
| 16                 | - morphogenesis ( 2475 )                                                |
| 17                 | - response to biotic stimulus ( 2230 )                                  |
| 18                 | - lipid metabolism ( 2168 )                                             |
| 19                 | - response to endogenous stimulus ( 2073 )                              |
| 20                 | - cell differentiation ( 1608 )                                         |
| 21                 | - response to external stimulus ( 1573 )                                |
| 22                 | - growth ( 1564 )                                                       |
| 23                 | - cell cycle ( 1406 )                                                   |
| 24                 | - secondary metabolism ( 1388 )                                         |
| 25                 | - DNA metabolism ( 1256 )                                               |
| 26                 | - generation of precursor metabolites and energy ( 1047 )               |
| 27                 | - cell growth ( 1036 )                                                  |
| 28                 | - embryonic development ( 1026 )                                        |
| 29                 | - protein biosynthesis ( 1015 )                                         |
| 30                 | - regulation of gene expression epigenetic ( 665 )                      |
| 31                 | - death ( 655 )                                                         |
| 32                 | - cell death ( 655 )                                                    |
| 33                 | - cell homeostasis ( 440 )                                              |
| 34                 | - cell-cell signaling ( 134 )                                           |
| 35                 | - behavior ( 51 )                                                       |

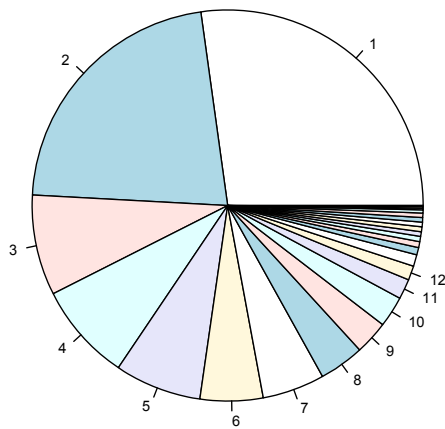

| MOLECULAR FUNCTION ACTIVITY |                                                             |
|-----------------------------|-------------------------------------------------------------|
| 1                           | - binding ( 20665 )                                         |
| 2                           | - catalytic activity ( 16686 )                              |
| 3                           | - nucleotide binding ( 6318 )                               |
| 4                           | - transferase activity ( 6160 )                             |
| 5                           | - hydrolase activity ( 5444 )                               |
| 6                           | - nucleic acid binding ( 3959 )                             |
| 7                           | - protein binding ( 3900 )                                  |
| 8                           | - kinase activity ( 2836 )                                  |
| 9                           | - transporter activity ( 2128 )                             |
| 10                          | - DNA binding ( 1942 )                                      |
| 11                          | - RNA binding ( 1262 )                                      |
| 12                          | - transcription factor activity ( 890 )                     |
| 13                          | - structural molecule activity ( 737 )                      |
| 14                          | - signal transducer activity ( 453 )                        |
| 15                          | - enzyme regulator activity ( 383 )                         |
| 16                          | - carbohydrate binding ( 325 )                              |
| 17                          | - receptor activity ( 300 )                                 |
| 18                          | - nuclease activity ( 300 )                                 |
| 19                          | - lipid binding ( 295 )                                     |
| 20                          | - translation factor activity, nucleic acid binding ( 282 ) |
| 21                          | - chromatin binding ( 278 )                                 |
| 22                          | - motor activity ( 196 )                                    |
| 23                          | - transcription regulator activity ( 106 )                  |
| 24                          | - receptor binding ( 90 )                                   |
| 25                          | - oxygen binding ( 68 )                                     |
| 26                          | - translation regulator activity ( 7 )                      |

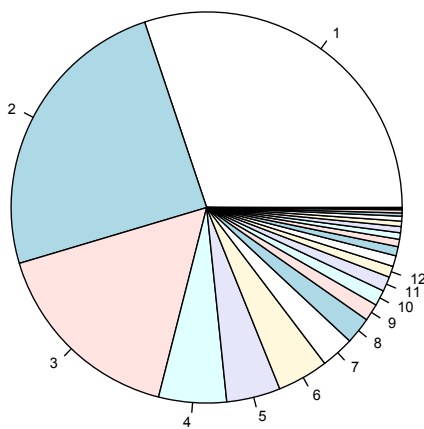

| CELLULAR COMPONENT |                                               |
|--------------------|-----------------------------------------------|
| 1                  | - cell ( 39790 )                              |
| 2                  | - intracellular ( 32300 )                     |
| 3                  | - cytoplasm ( 21700 )                         |
| 4                  | - nucleus ( 7396 )                            |
| 5                  | - plasma membrane ( 5876 )                    |
| 6                  | - plastid ( 5585 )                            |
| 7                  | - mitochondrion ( 3589 )                      |
| 8                  | - cytosol ( 2925 )                            |
| 9                  | - extracellular region ( 1882 )               |
| 10                 | - vacuole ( 1709 )                            |
| 11                 | - Golgi apparatus ( 1607 )                    |
| 12                 | - external encapsulating structure ( 1225 )   |
| 13                 | - cell wall ( 1182 )                          |
| 14                 | - endoplasmic reticulum ( 1001 )              |
| 15                 | - nucleolus ( 798 )                           |
| 16                 | - thylakoid ( 716 )                           |
| 17                 | - ribosome ( 685 )                            |
| 18                 | - cytoskeleton ( 579 )                        |
| 19                 | - endosome ( 525 )                            |
| 20                 | - peroxisome ( 367 )                          |
| 21                 | - nucleoplasm ( 328 )                         |
| 22                 | - nuclear membrane ( 171 )                    |
| 23                 | - extracellular space ( 43 )                  |
| 24                 | - lysosome ( 25 )                             |
| 25                 | - extracellular matrix (sensu Metazoa) ( 10 ) |

**Figure S4** The distribution of transcripts within the *I. purpurea* transcriptome assigned to GOSlim categories within the Biological Process, Molecular Function and Cellular Component GO categories.
