# Supplementary material for: De Novo Assembly and Annotation of the Transcriptome of the Agricultural Weed Ipomoea purpurea Uncovers Gene Expression Changes Associated with Herbicide Resistance
Source: PubMed Central journal article supplement (PMC4199709; doi:10.1534/g3.114.013508), 2014-08-25
Supplement: supp_g3.114.013508_TableS2.pdf [file supp_g3.114.013508_TableS2.pdf]

**Table S2 RNA-Seq analysis of common morning glory (*I. purpurea*) using the Illumina hiseq2000L sequencing yields and quality filtering.**

| Treatments                 | Sample  | Reads (M) | HQ (M) | HQ (%) |
|----------------------------|---------|-----------|--------|--------|
| Glyphosate Susceptible     | 068-1-1 | 65.8      | 62.9   | 95.6   |
|                            | 077-1-2 | 67.4      | 64.4   | 95.5   |
|                            | 079-1-3 | 41.2      | 39.0   | 94.7   |
| Glyphosate Resistant       | 336-1-2 | 152.0     | 146.9  | 96.6   |
|                            | 351-1-2 | 57.5      | 54.2   | 94.3   |
|                            | 358-1-3 | 78.3      | 75.0   | 95.8   |
| Total raw reads (millions) |         | 462.2     | 442.4  |        |
| Average per sample         |         | 77.0      | 73.7   | 95.4   |
