# Supplementary material for: De Novo Assembly and Annotation of the Transcriptome of the Agricultural Weed Ipomoea purpurea Uncovers Gene Expression Changes Associated with Herbicide Resistance
Source: PubMed Central journal article supplement (PMC4199709; doi:10.1534/g3.114.013508), 2014-08-25
Supplement: supp_g3.114.013508_TableS3.pdf [file supp_g3.114.013508_TableS3.pdf]

**Table S3 Efficiency of mapping Illumina hiseq2000 RNA-Seq reads against the *I. purpurea* reference transcriptome, a de novo cDNA assembly.** Note Bowtie2 reports on paired reads, effectively halving the absolute raw and HQ read counts seen in Table S1.

| Treatments                    | Sample  | Mapped Reads |                  | Unique Alignments |      |
|-------------------------------|---------|--------------|------------------|-------------------|------|
|                               |         | (M)          | Mapped Reads (%) | (M)               | (%)  |
| Glyphosate Susceptible        | 068-1-1 | 14.9         | 47.4             | 12.8              | 40.6 |
|                               | 077-1-2 | 15.1         | 46.8             | 12.8              | 39.6 |
|                               | 079-1-3 | 9.1          | 46.5             | 7.6               | 39.1 |
| Glyphosate Resistant          | 336-1-2 | 33.5         | 45.6             | 28.7              | 39.1 |
|                               | 351-1-2 | 14.6         | 65.7             | 13.6              | 54.7 |
|                               | 358-1-3 | 22.2         | 59.1             | 19.0              | 50.6 |
| Total mapped reads (millions) |         | 109.4        |                  | 94.5              |      |
| Percent of HQ reads mapped    |         | 49.4         |                  | 42.8              |      |
| Percent of raw reads mapped   |         | 47.4         |                  | 40.8              |      |
