# Supplementary material for: De Novo Assembly and Annotation of the Transcriptome of the Agricultural Weed Ipomoea purpurea Uncovers Gene Expression Changes Associated with Herbicide Resistance
Source: PubMed Central journal article supplement (PMC4199709; doi:10.1534/g3.114.013508), 2014-08-25
Supplement: supp_g3.114.013508_TableS4.pdf [file supp_g3.114.013508_TableS4.pdf]

**Table S4 Primers developed for the qPCR verification of DEGs.**

| Sequence Name       | Sequence                   | Tm (50mM NaCl) C |
|---------------------|----------------------------|------------------|
| abc-b_2016948_178F  | CTT TGC TGG CTT TCT TGG AC | 54.52741302      |
| abc-b_2016948_178R  | GGT GAT CGA ATG GCG TTA CT | 54.99775102      |
| atpbin-2010370_162F | CTC CGC TCT TTC TTC CAA TG | 53.5183376       |
| atpbin-2010370_162R | TGC AGT ATA TCG GTG GTG GA | 55.53902069      |
| brass-2061274_150F  | CTG GTA TAA CGA GCC GGT GT | 56.76005614      |
| brass-2061274_150R  | GCA TAG ATT TCG ACG GCA TT | 53.33061546      |
| ceram-2056577_177F  | GAG CCA GGC TTG AGA GTG TT | 57.31439485      |
| ceram-2056577_177R  | GCT GTT TGC AAT GTG AGC AT | 54.56376496      |
| cysrec-2011172_162F | GGT TCC CTA GCT CCC TCA TC | 56.77992894      |
| cysrec-2011172_162R | ACT AGG TCA CCG CCT CTT CA | 57.77335135      |
| germd-2001731_176F  | TTG AGC CAA ATG GAA CAA CA | 52.8778193       |
| germd-2001731_176R  | CCA AAA GTA GCC TTC CAC CA | 55.03216815      |
| glut-s_2002932_175F | TTT TGT GCA CTT GGG TTG AA | 53.31376738      |
| glut-s_2002932_175R | GCA CCA GTT TCA ATT GGC TT | 54.2963209       |
| helica-2013762_163F | TTG CAA CTG GCT TTC AAC AG | 54.15438015      |
| helica-2013762_163R | ATT TTC TGC AAA CCT GGT GG | 53.78453676      |
| P450_1-2005659_173F | TGT ATC AAC CAC GGT CTC CA | 55.65938391      |
| P450_1-2005659_173R | CGC GCT TTC CTA TCT ACC AG | 55.29411425      |
| P450_2-2003522_172F | GAG CAA AAA CCT TGC AGA CC | 54.76344105      |
| P450_2-2003522_172R | AAT TGC TGG ACA CCA ACC TC | 55.56952121      |
| P450a_2003581_168F  | AGT GCT GGT GGT TAG CGA CT | 58.78593189      |
| P450a_2003581_168R  | ATA AGT TTG CGA ATC CCA CG | 53.24697226      |
| pecmet_2017152_161F | TAG AAT TGC CGC TGA CTG TG | 55.20539275      |
| pecmet_2017152_161R | GAT GGG TTC ATA GCC CAA GA | 54.40150801      |
| proto_2011804_157F  | CGG AGT TCT GGT ATT GGG GT | 56.64581809      |
| proto_2011804_157R  | CAT AAA GGT GGC GAC GAT GG | 56.10508724      |

|                      |                            |             |
|----------------------|----------------------------|-------------|
| serthre-2055046_161F | GGA GAA GGG AAG TCT CGA CC | 56.78871641 |
| serthre-2055046_161R | TGA TCG GAG TGT CCA ATG AG | 54.20362614 |
| vichyd_2063945_178F  | TAT TTG GTG ATC GCG TGA AA | 52.35251201 |
| vichyd_2063945_178R  | TGA GCA AGA AGC AAA TGG TG | 53.72764614 |
| wb-abc_2017606_160F  | AAG CTT CTG TTC CTG GAC GA | 56.15266566 |
| wb-abc_2017606_160R  | GGC ACA GGC TAG TGA AGA GG | 57.64456754 |

---
