# Supplementary material for: De Novo Assembly and Annotation of the Transcriptome of the Agricultural Weed Ipomoea purpurea Uncovers Gene Expression Changes Associated with Herbicide Resistance
Source: PubMed Central journal article supplement (PMC4199709; doi:10.1534/g3.114.013508), 2014-08-25
Supplement: supp_g3.114.013508_TableS5.pdf [file supp_g3.114.013508_TableS5.pdf]

**Table S5** Differentially expressed genes as identified by edgeR after binning scaffolds based on length (bins were defined as 200-1000 bp, 1001-2000 bp, 2001-3000 bp, and >3000 bp). Note resistant/susceptible log<sub>2</sub> fold changes.

| rank | bin (bp)    | Scaffold ID | topblast                                                   | logFC        | logCPM      | PValue   | padj        |
|------|-------------|-------------|------------------------------------------------------------|--------------|-------------|----------|-------------|
| 1    | 1,001-2,000 | 2009240     | protein                                                    | -4.956514395 | 4.417191331 | 1.60F-13 | 1.33F-09    |
| 2    | 1,001-2,000 | 2063945     | vicianin hydrolase-like                                    | -2.951166513 | 5.431831016 | 8.98F-10 | 3.72F-06    |
| 3    | 1,001-2,000 | 2001731     | [-]-germacrene d synthase                                  | 4.77309533   | 3.683966828 | 7.52F-09 | 2.07F-05    |
| 4    | 200-1,000   | 2056577     | ceramidase family protein                                  | -7.490398504 | 3.019096973 | 5.90F-09 | 4.79F-05    |
| 5    | 1,001-2,000 | 2009241     | protein                                                    | -4.183410284 | 3.563076107 | 4.15F-08 | 8.60F-05    |
| 6    | 1,001-2,000 | 2005233     | [-]-germacrene d synthase                                  | 5.375616041  | 2.268376148 | 9.28F-08 | 0.000153718 |
| 7    | 1,001-2,000 | 2010370     | atp binding                                                | -4.830721823 | 4.01726904  | 1.23F-06 | 0.001701055 |
| 8    | 1,001-2,000 | 2002437     | protein                                                    | 2.476840484  | 5.144280666 | 3.69F-06 | 0.004362936 |
| 9    | 1,001-2,000 | 2061274     | brassinosteroid insensitive 1-associated receptor kinase 1 | -4.079306873 | 4.148482421 | 4.98F-06 | 0.005147925 |
| 10   | 200-1,000   | 2003581     | cytochrome p450 82a3-like                                  | 3.295661347  | 3.632279277 | 2.64F-06 | 0.010717398 |
| 11   | 1,001-2,000 | 2004377     | protein                                                    | -3.861554692 | 3.112662587 | 3.24F-05 | 0.029797255 |
| 12   | 1,001-2,000 | 2013762     | u5 small nuclear ribonucleoprotein helicase                | 5.089691419  | 1.196586827 | 3.61F-05 | 0.02985129  |
| 13   | 1,001-2,000 | 2009597     | atp binding                                                | -1.930162869 | 8.43404822  | 4.09F-05 | 0.030796464 |
| 14   | 1,001-2,000 | 2017152     | pectin methylesterase                                      | -3.254112192 | 4.114218356 | 4.61F-05 | 0.031807096 |
| 15   | 200-1,000   | 2054556     | protein                                                    | 3.437708896  | 2.968028123 | 1.75F-05 | 0.036093279 |
| 16   | 200-1,000   | 2059855     | protein kinase                                             | 4.123441785  | 4.96632482  | 1.78F-05 | 0.036093279 |
| 17   | 1,001-2,000 | 2010065     | indoleacetic acid-induced-like protein                     | -2.027993775 | 4.890619041 | 5.67F-05 | 0.036114335 |
